# Supplementary material for: Enhancing Precision in Crop Residue Cover Estimation: A Comparative Analysis of Sentinel-2 MSI and Landsat 8 OLI Data
Source: Preprints.org preprint supplement (doi:10.20944/preprints202403.0085.v1), 2024-03-04
Supplement: Supplementary file 4 [file supplementary]

Supplemental Material:

Table S1 Landsat 8 OLI: basic measurement parameters for the sensor

| **Name** | **Description** | **Wavelength (nm)** | **Resolution (m)** |
| --- | --- | --- | --- |
| B1 | Coastal aerosol | 433–453 | 30 |
| B2 | Blue (B) | 450–515 | 30 |
| B3 | Green (G) | 525–600 | 30 |
| B4 | Red (R) | 630–680 | 30 |
| B5 | Near infrared (NIR) | 845–885 | 30 |
| B6 | Shortwave infrared 1 (SWIR1) | 1560–1660 | 30 |
| B7 | Shortwave infrared 2(SWIR2) | 2100–2300 | 30 |
| B8 | Panchromatic | 500–680 | 15 |
| B9 | Cirrus | 1360–1380 | 30 |
| B10 | Thermal infrared1 (TIR1) | 10,600–11,190 | 100 |
| B11 | Thermal infrared 2 (TIR2) | 11,500–12,510 | 100 |

Table S2 Sentinel-2 MSI: basic measurement parameters for the sensor

| **Name** | **Description** | **Wavelength (nm)** | **Resolution (m)** |
| --- | --- | --- | --- |
| B1 | Aerosols | 433–453 | 60 |
| B2 | Blue | 458–523 | 10 |
| B3 | Green | 543–578 | 10 |
| B4 | Red | 650–680 | 10 |
| B5 | Red Edge 1 | 698–713 | 20 |
| B6 | Red Edge 2 | 733–748 | 20 |
| B7 | Red Edge 3 | 773–793 | 20 |
| B8 | NIR | 785–900 | 10 |
| B8A | Red Edge 4 | 855–875 | 20 |
| B9 | Water vapor | 935–955 | 60 |
| B11 | SWIR 1 | 1565–1655 | 20 |
| B12 | SWIR 2 | 2100–2280 | 20 |
